# Supplementary material
Source: MDPI journal article supplement (https://www.mdpi.com/2673-9992/14/1/137)
Supplement: s1 [file s1]

University of Bucharest

Faculty of Biology

Department of Molecular Biology and Biochemistry

Veronica Popa 1, Sorin Avramescu 2 and Miruna-Silvia Stan 1,\*

1. Department of Molecular Biology and Biochemistry, Faculty of Biology, University of Bucharest, Romania; vpopa20@s.bio.unibuc.ro

2. Department of Organic Chemistry, Biochemistry and Catalysis, Faculty of Chemistry, University of Bucharest, Romania; sorin.avramescu@chimie.unibuc.ro

\*Correspondence: miruna.stan@bio.unibuc.ro

**Extraction of Anthocyanins from Black Currants  
and In Vitro Testing for the Determination of  
Antioxidant Activity**

# Introduction

Black currants

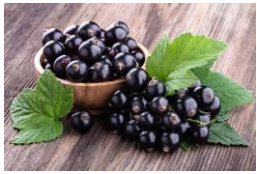

Anthocyanins

Rich source of vitamin C (50 - 280 mg/100 g)  
 Antioxidant, antimicrobial, anti-inflammatory, chemoprotective properties  
 Reducing the risks of cancer and cardiovascular diseases

vacuoles of plant cells

Red  
 Purple  
 Blue

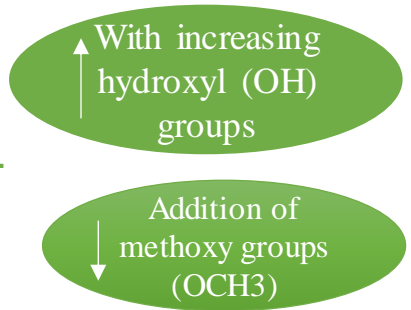

antioxidants and free radical scavengers, are able to act as reducing agents in the electron transfer reaction pathway.

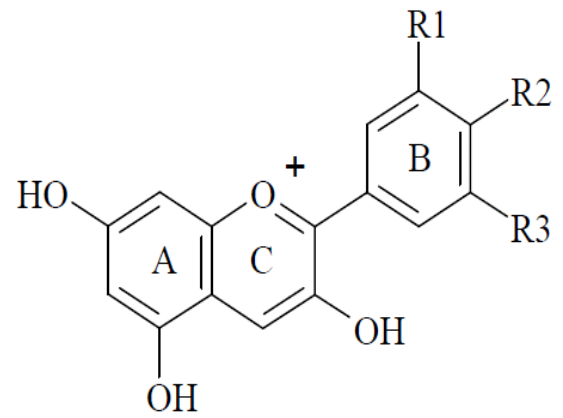

| Name                | R1               | R2 | R3               |
|---------------------|------------------|----|------------------|
| <i>Pelargonidin</i> | H                | OH | H                |
| <i>Cyanidin</i>     | OH               | OH | H                |
| <i>Delphinidin</i>  | OH               | OH | OH               |
| <i>Peonidin</i>     | OCH <sub>3</sub> | OH | H                |
| <i>Petunidin</i>    | OCH <sub>3</sub> | OH | OH               |
| <i>Malvidin</i>     | OCH <sub>3</sub> | OH | OCH <sub>3</sub> |

General chemical structure and classification of anthocyanins  
 (After Prior and Wu, 2006)

# Purpose and objectives

» The purpose of this paper is to investigate the antitumoral effects produced by exposure to blackcurrant extract, rich in anthocyanins, on cervical cancer.

» The objectives of this study are represented by:

obtaining blackcurrant extract

assessment of antioxidant capacity

DPPH test (2,2-difenyl-1-picrylhydrazyl)  
Oxygen radical absorbance capacity (ORAC)  
The radical neutralization test of NO

evaluation of the viability of the HeLa cell line following exposure to certain concentrations of active compounds and measurement of the NO level

cytometric analysis for evaluate the mode of action on the phases of the cell cycle

the effect of the extract on the antioxidant defense capacity

evaluation of catalase activity  
assessment of reduced glutathione levels  
glutathione S-transferase level

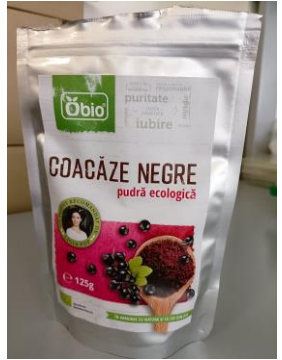

# Materials and methods

- Extraction of anthocyanins from blackcurrant powder
- Determinations of the antioxidant capacity by the DPPH test
- Determination of total polyphenol content
- Determination of NO neutralization capacity

- Viability assay and measurement of nitric oxide levels
- Catalase activity dosage
- Glutathione S-transferase dosage
- Determination of the concentration of reduced glutathione (GSH)
- Cell cycle analysis by flow cytometry

**NO test**  
**MTT test**

Concentrations: 0,5 µg/mL polyphenol  
2,5 µg/mL polyphenol  
Time intervals: 24 and 72 hours

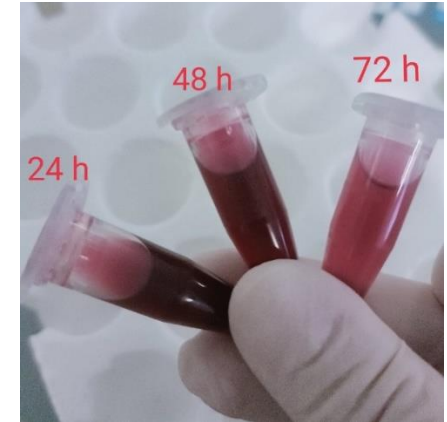

HeLa Cells

# Results and discussions

## Determination of the antioxidant capacity of blackcurrant extracts

| Extract  | Anthocyanin content (mg/L) | DPPH test (% inhibition of reactive oxygen species) | ORAC ( $\mu\text{M}$ Trolox) | Total polyphenol content (mg GAE/mL) |
|----------|----------------------------|-----------------------------------------------------|------------------------------|--------------------------------------|
| 24 hours | 63.465                     | 16% $\pm$ 0.002                                     | 15.6                         | 75.10                                |
| 48 hours | 364.550                    | 8% $\pm$ 0.21                                       | 12.6                         | 51.69                                |
| 72 hours | 0                          | 6% $\pm$ 0.087                                      | 5.6                          | 20.80                                |

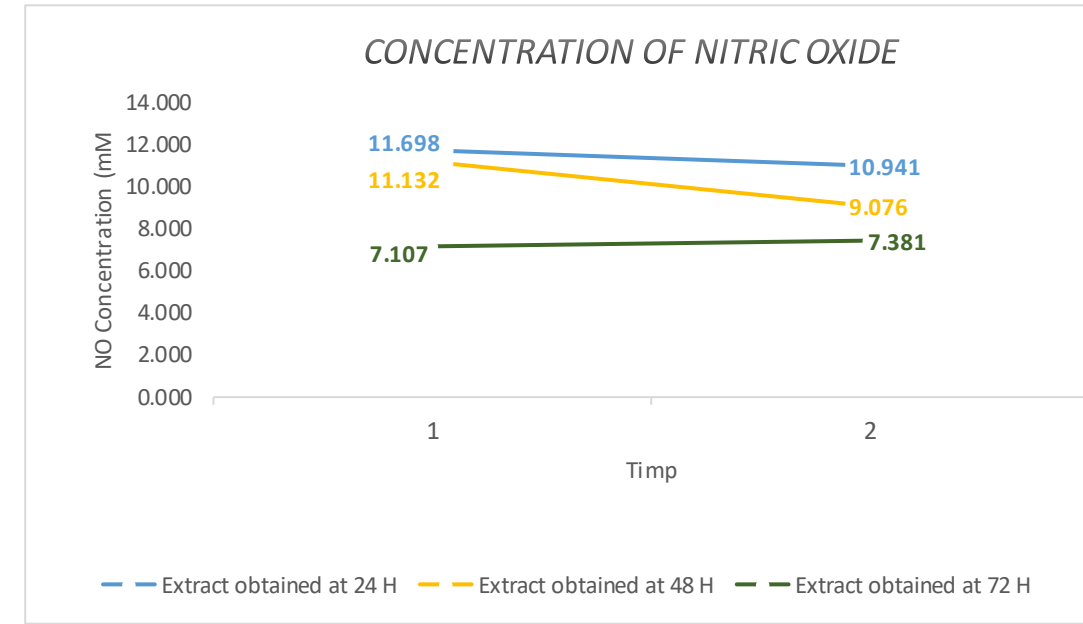

Graphic representation of nitric oxide scavenging capacity at 0 minutes (1) and 30 minutes (2)

# Chemical analysis of the extracts by the HPLC method

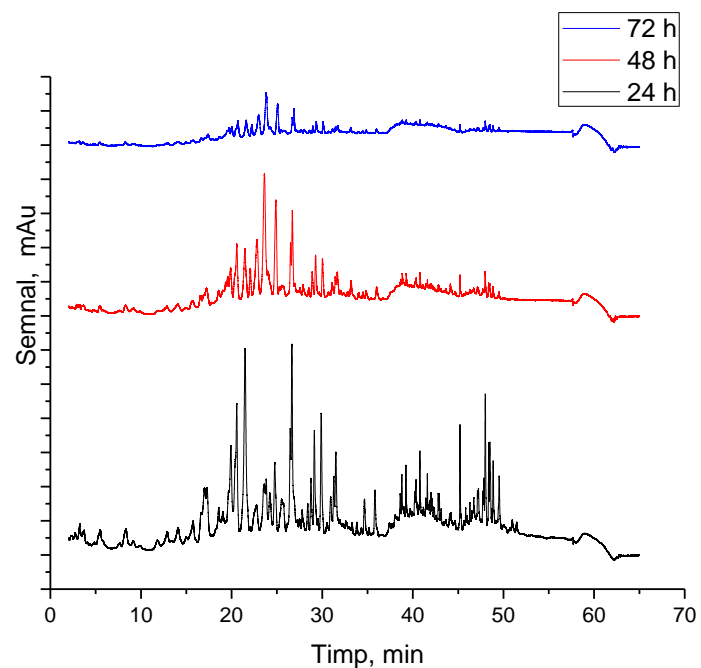

*HPLC profiles of the extracts obtained at the 3 time intervals. Peak identifications are suggested based on HPLC standards, mass spectrometry analysis, and literature comparisons*

|                         | Extract obtained at<br>24 hours<br>(mg/L) | Extract obtained at<br>48 hours<br>(mg/L) | Extract obtained at<br>72 hours<br>(mg/L) |
|-------------------------|-------------------------------------------|-------------------------------------------|-------------------------------------------|
| <i>Galic acid</i>       | 3.258                                     | 0.628                                     | 0                                         |
| <i>Catechin</i>         | 41.692                                    | 31.513                                    | 0                                         |
| <i>Caffeic acid</i>     | 0.066                                     | 0.412                                     | 0                                         |
| <i>Chlorogenic acid</i> | 5.747                                     | 13.446                                    | 4.632                                     |
| <i>Epicatechin</i>      | 180.196                                   | 942.155                                   | 360.949                                   |
| <i>Delphinidin</i>      | 39,985                                    | 364.550                                   | 0                                         |
| <i>Coumaric acid</i>    | 1.621                                     | 0                                         | 0                                         |
| <i>Daidzein</i>         | 14.557                                    | 0                                         | 0                                         |
| <i>Hiperosiide</i>      | 40.879                                    | 0                                         | 0                                         |
| <i>Rutin</i>            | 3.754                                     | 1.481                                     | 0.640                                     |
| <i>Naringin</i>         | 17.301                                    | 5.130                                     | 0.990                                     |
| <i>Malvidin</i>         | 23.478                                    | 0                                         | 0                                         |
| <i>Quercitin</i>        | 1.033                                     | 1.127                                     | 0                                         |
| <i>Naringenin</i>       | 2.254                                     | 0                                         | 0                                         |
| <i>Genistein</i>        | 0                                         | 0                                         | 0                                         |

# Viability assay and measurement of nitric oxide (NO) level – HeLa cells

## MTT test

Extract obtained at 24 hours

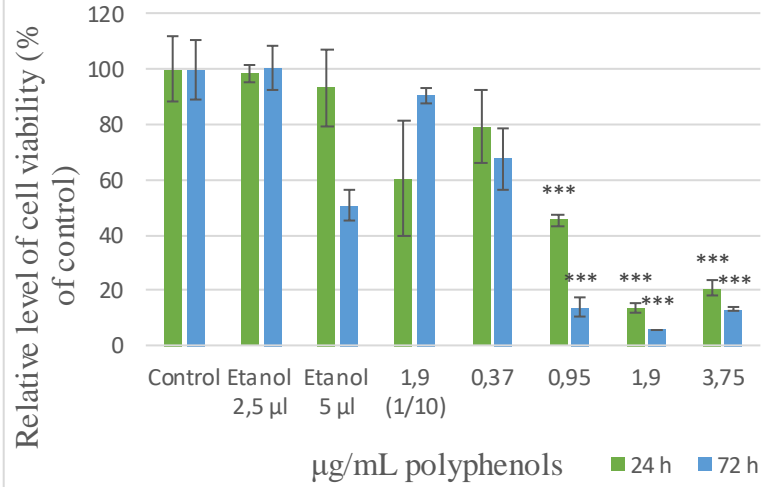

Extract obtained at 48 hours

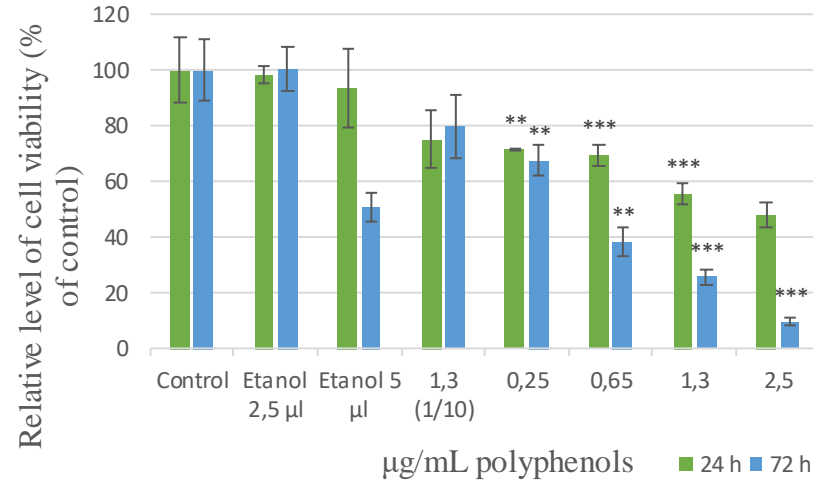

Extract obtained at 72 hours

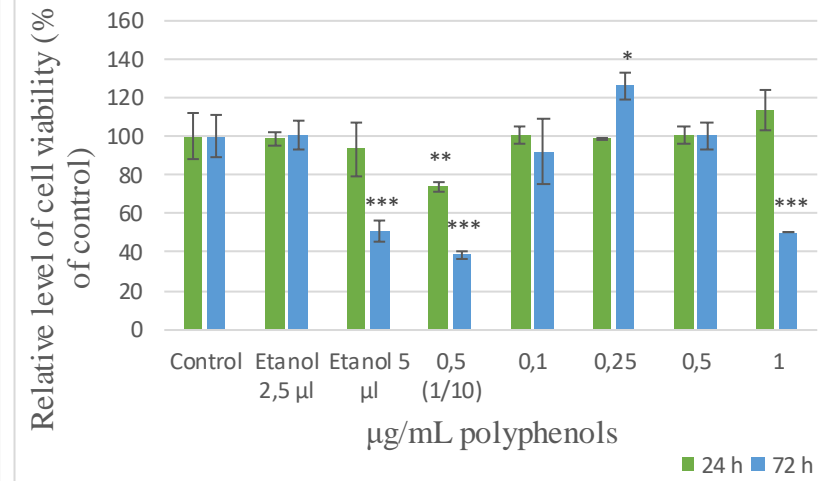

## NO test

Extract obtained at 24 hours

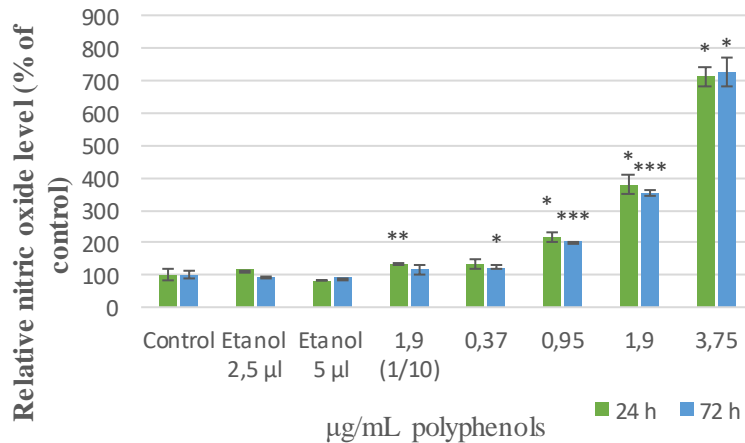

Extract obtained at 48 hours

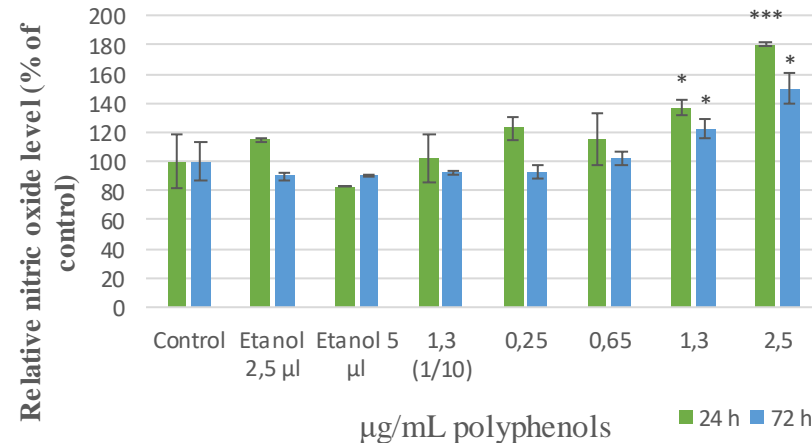

Extract obtained at 72 hours

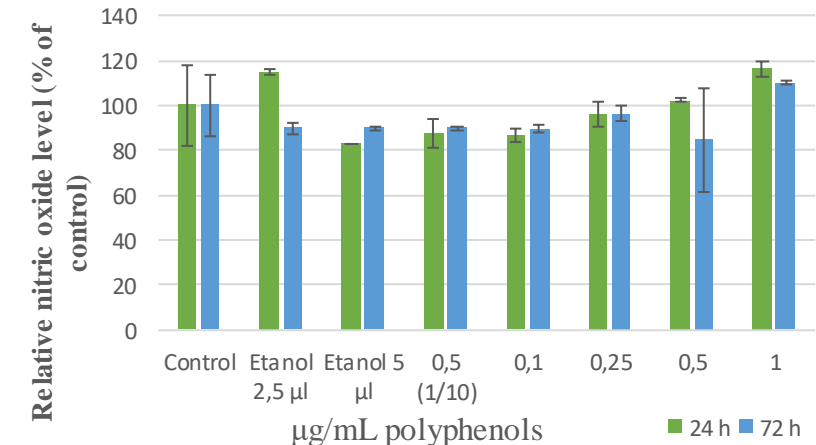

## *Determination of the antioxidant enzyme activities*

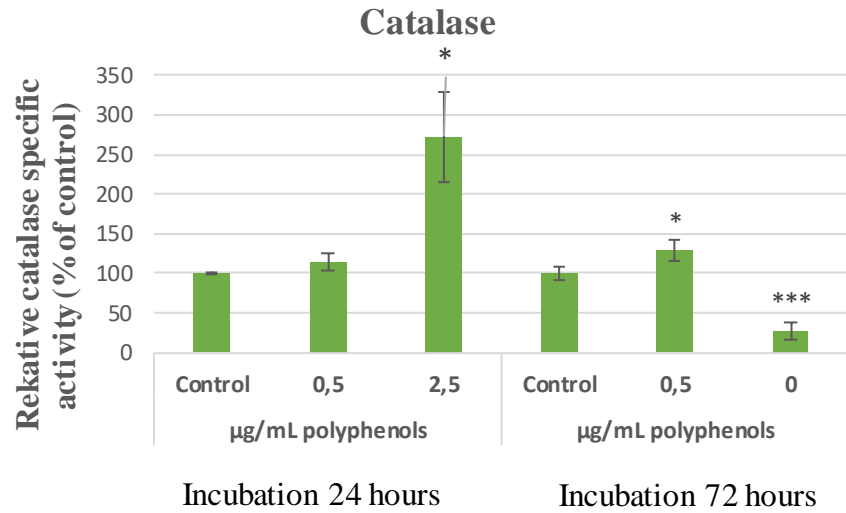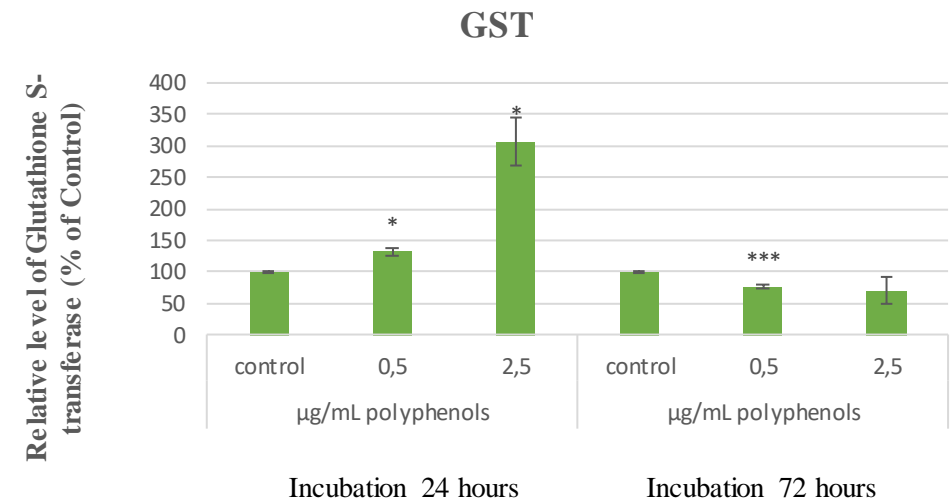

*Evolution of the catalase activity after exposure for 24 and 72 hours to different concentrations of the extract obtained at 48 hours*

*Glutathione-S-transferase (GST) concentration after exposure for 24 and 72 hours to different concentrations of the extract obtained at 48 hours*

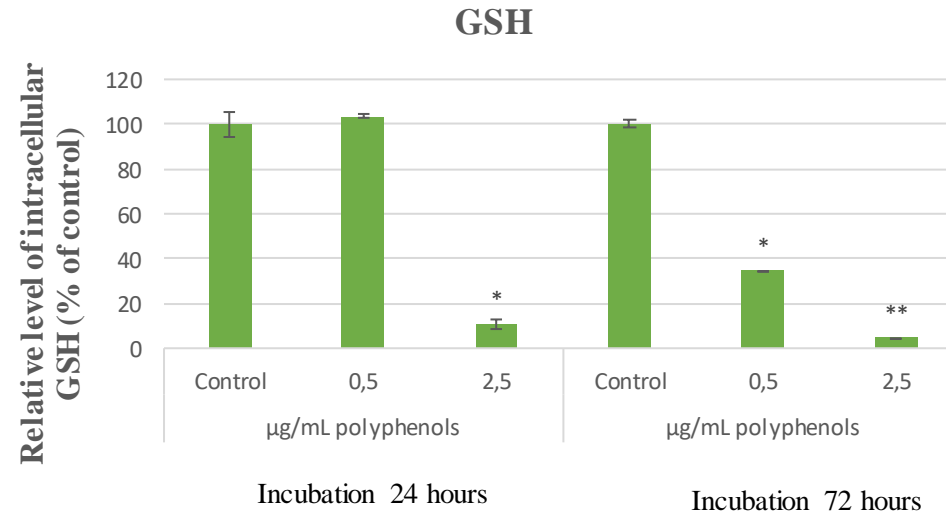

*The concentration of reduced glutation (GSH) after exposure for 24 and 72 hours to different concentration of the extract obtained at 48 hours*



## Determination of cell cycle phases

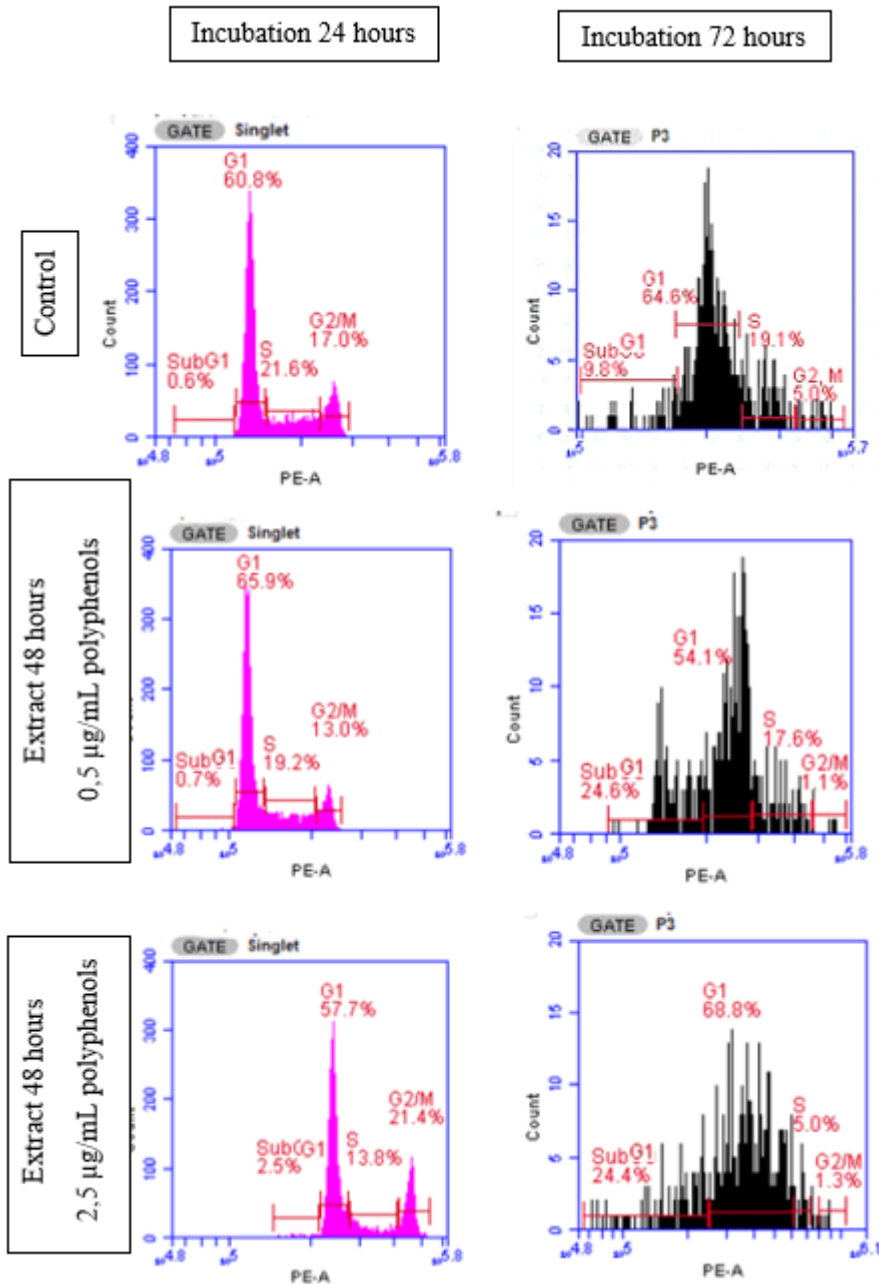

Percentage results obtained from flow cytometry analysis at 24 and 72 hours with different concentrations of the extract obtained at 48 hours.

| <i>Incubation 24 hours</i>   | Sub-G1    | G0/G1     | S         | G2/M      |
|------------------------------|-----------|-----------|-----------|-----------|
|                              | (% cells) | (% cells) | (% cells) | (% cells) |
| <i>Control</i>               | 0.65      | 60.83     | 21.58     | 17        |
| <i>0,5 µg/mL polyphenols</i> | 0.74      | 65.93     | 19.19     | 12.99     |
| <i>2,5 µg/mL polyphenols</i> | 2.51      | 57.68     | 13.77     | 21.44     |

| <i>Incubation 72 hours</i>   | Sub-G1    | G0/G1     | S         | G2/M      |
|------------------------------|-----------|-----------|-----------|-----------|
|                              | (% cells) | (% cells) | (% cells) | (% cells) |
| <i>Control</i>               | 9.76      | 64.64     | 19.09     | 4.99      |
| <i>0,5 µg/mL polyphenols</i> | 24.57     | 54.13     | 17.61     | 1.09      |
| <i>2,5 µg/mL polyphenols</i> | 24.35     | 68.75     | 4.96      | 1.29      |

# Conclusions

---

The extract with the highest concentration of polyphenols, the absorption capacity of O<sub>2</sub> radicals (ORAC), but also the ability to inhibit the propagation of free radical reactions was the one obtained at 24 hours.

---

The extract richest in anthocyanins (delphinidin, malvidin), with an antiproliferative capacity and a higher level of NO neutralization was the one obtained at 48 hours, which is why it was chosen for the in vitro studies with HeLa cells, of cancer cervix.

---

The decrease in cell viability for the extract obtained at 48 h was dependent on the time and concentration used.

---

An increase in enzyme activity (catalase and glutathione S-transferase) was noted after the first 24 hours of incubation in the case of the highest concentration tested, which suggests a tendency of the cells to counteract the oxidative stress induced by blackcurrant extract, followed by a significant decrease in the activity of these enzymes, also correlated with the reduced level of GSH.

---

Incubation of cells with blackcurrant extract resulted in cell cycle arrest in the G<sub>1</sub> and sub-G<sub>1</sub> phases after 24 and 72 hours, respectively.
